# Supplementary material
Source: Research Square preprint supplement (doi:10.21203/rs.3.rs-8914957/v1)
Supplement: Supplementary file 1 [file 521662be12c6b594da806374.docx]

**Supplementary Data 4**

**Fig S1. The expression levels of miR-7-5p and target genes after transfection of miR-7-5p inhibitor in SW1353 cells.** Transfection of miR-7-5p inhibitor exhibited lower expression of miRNA in comparison to the non-transfected and scrambled control. The expression values were normalized to either the non-transfected control or the scrambled control. Data represent mean ± SEM. Statistical significance determined by unpaired t-test and  *p* < 0.05 considered significant. *** p < 0.001 and **** p < 0.0001 versus the control group.

**Table S1.** The primer sequences and the product size of the target genes

| *RAF1-* 107bp | Forward | TCAGGAATGAGGTGGCTGTTCTG |
| --- | --- | --- |
|  | Reverse | CTCGCACCACTGGGTCACAATT |
| *RELA-*135bp | Forward | TGAACCGAAACTCTGGCAGCTG |
|  | Reverse | CATCAGCTTGCGAAAAGGAGCC |
| *IRS1-*132bp | Forward | AGTCTGTCGTCCAGTAGCACCA |
|  | Reverse | ACTGGAGCCATACTCATCCGAG |
| *PIK3CD*-160bp | Forward | TGCCAAACCACCTCCCATTCCT |
|  | Reverse | CATCTCGTTGCCGTGGAAAAGC |
| *EIF4E*-123bp | Forward | ATGCCTGGCTGTGACTACTCAC |
|  | Reverse | GAGGTCACTTCGTCTCTGCTGT |
| *SNCA-*124bp | Forward | ACCAAACAGGGTGTGGCAGAAG |
|  | Reverse | CTTGCTCTTTGGTCTTCTCAGCC |
| *TGFB2-*151bp | Forward | AAGAAGCGTGCTTTGGATGCGG |
|  | Reverse | ATGCTCCAGCACAGAAGTTGGC |
| *ARRB1-*99bp | Forward | TGGAGAACCCATCAGCGTCAAC |
|  | Reverse | AGGCAGATGTCTGCATACTGGC |
| *GAPDH*-131bp | Forward | GTCTCCTCTGACTTCAACAGCG |
|  | Reverse | ACCACCCTGTTGCTGTAGCCAA |
