# Supplementary material
Source: Research Square preprint supplement (doi:10.21203/rs.3.rs-8914957/v1)
Supplement: Supplementary file 2 [file bd3bc54348910884b6f1e9c6.docx]

**Supplementary Data 2**

**Table S1.** Differentially expressed miRNAs in the early OA vs control, late OA vs control and late OA vs Early OA groups of Dunkin-Hartley guinea pigs

| *Early OA vs Control* | | |
| --- | --- | --- |
| *miRNA* | ***Fold regulation*** | ***p-value*** |
| miR-101-3p | 3.02 | 0.020635 |
| miR-92b-3p | 3.25 | 0.005022 |
| miR-130b-5p | -5.11 | 0.007763 |
| miR-130b-3p | -4.71 | 0.010988 |
| miR-20b-5p | -3.66 | 0.032224 |
| miR-7-5p | -3.18 | 0.006779 |

| *Late OA vs Control* | | |
| --- | --- | --- |
| *miRNA* | ***Fold regulation*** | ***p-value*** |
| miR-130b-3p | -65.84 | 0.001157 |
| miR-10b-5p | -33.22 | 0.010623 |
| miR-379-5p | -32.76 | 0.024261 |
| miR-455-5p | -25.15 | 0.017858 |
| miR-148b-3p | -25.06 | 0.006054 |
| miR-154-5p | -24.08 | 0.020843 |
| miR-411a-3p | -23.8 | 0.00435 |
| let-7g-5p | -22.56 | 0.001952 |
| miR-369-5p | -22.47 | 0.012852 |
| miR-7-5p | -22.09 | 0.000284 |
| miR-376a-3p | -20.79 | 0.008344 |
| miR-342-3p | -18.47 | 0.007302 |
| miR-191-5p | -18.22 | 0.010764 |
| miR-656-3p | -17.48 | 0.013557 |
| miR-26b-5p | -17.09 | 0.003622 |
| let-7f-2-3p | -16.92 | 0.000756 |
| miR-127-3p | -15.07 | 0.018351 |
| miR-301a-3p | -15 | 0.024813 |
| miR-505-5p | -14.5 | 0.011337 |
| miR-505-3p | -14.42 | 0.000019 |
| miR-431-5p | -14.39 | 0.005846 |
| miR-30c-5p | -14.02 | 0.014926 |
| miR-135b-5p | -13.72 | 0.02505 |
| miR-20b-5p | -13.38 | 0.003804 |
| miR-140-5p | -11.74 | 0.016623 |
| miR-101-3p | -11.5 | 0.028593 |
| miR-574-3p | -11.17 | 0.006412 |
| miR-99a-5p | -10.67 | 0.001551 |
| miR-493-5p | -10.46 | 0.009797 |
| miR-454-3p | -9.93 | 0.016104 |
| miR-29c-3p | -9.57 | 0.022933 |
| miR125b-2-3p | -8.6 | 0.000474 |
| miR-130b-5p | -8.15 | 0.00164 |
| miR-424-3p | -7.14 | 0.017605 |
| miR-99a-3p | -6.5 | 0.012924 |
| miR-425-3p | -5.94 | 0.000315 |
| let-7a-3p | -4.49 | 0.004869 |
| miR-135b-3p | -2.14 | 0.017831 |

| *Late OA vs Early OA* | | |
| --- | --- | --- |
| *miRNA* | ***Fold regulation*** | ***p-value*** |
| miR-10b-5p | -38.69 | 4E-06 |
| miR-101-3p | -34.71 | 5E-05 |
| miR-148b-3p | -33.9 | 0.0049 |
| miR-455-5p | -32.41 | 0.0002 |
| miR-191-5p | -29.3 | 6E-05 |
| miR-127-3p | -28.73 | 0.0003 |
| miR-379-5p | -26.48 | 0.0003 |
| miR-140-5p | -23.49 | 6E-05 |
| let-7f-2-3p | -23.45 | 0 |
| let-7g-5p | -22.42 | 5E-05 |
| miR-135b-5p | -21.8 | 9E-05 |
| miR-411a-3p | -21.77 | 5E-05 |
| miR-505-5p | -20.07 | 0.0035 |
| miR-154-5p | -20.04 | 7E-05 |
| miR-369-5p | -19.96 | 8E-05 |
| miR-99a-5p | -19.83 | 0.0003 |
| miR-301a-3p | -19.71 | 0.0012 |
| miR-30c-5p | -19.43 | 3E-05 |
| miR-26b-5p | -18.45 | 0.0001 |
| miR-376a-3p | -18.36 | 2E-05 |
| miR-574-3p | -18 | 0 |
| miR-505-3p | -16.96 | 0.0006 |
| miR-342-3p | -14.87 | 3E-05 |
| miR125b-2-3p | -14.6 | 2E-05 |
| miR-29c-3p | -14.12 | 0.0007 |
| miR-130b-3p | -13.97 | 0.0001 |
| miR-431-5p | -13.62 | 0.0013 |
| miR-656-3p | -10.73 | 2E-06 |
| miR-99a-3p | -10.43 | 0.002 |
| miR-337-5p | -8.9 | 0.0013 |
| miR-335-3p | -8.78 | 0.004 |
| miR-425-3p | -8.31 | 0.0002 |
| miR-136-3p | -7.14 | 0.0011 |
| miR-7-5p | -6.96 | 0.0029 |
| miR--493-5p | -6.64 | 0.0003 |
| mmu-let-7a-3p | -5.69 | 1E-05 |
| miR-454-3p | -5.37 | 0.0133 |
| miR-376a-5p | -4.8 | 0.0004 |
| miR-92b-3p | -4.46 | 0.0037 |
| miR-20b-5p | -3.65 | 0.0312 |
| let-7b-3p | -3.12 | 0.0043 |
